# Supplementary material for: Detection and prevalence of SARS-CoV-2 co-infections during the Omicron variant circulation, France, December 2021 - February 2022
Source: bioRxiv or medRxiv preprint supplement (doi:10.1101/2022.03.24.22272871), 2022-03-27

Figure S1

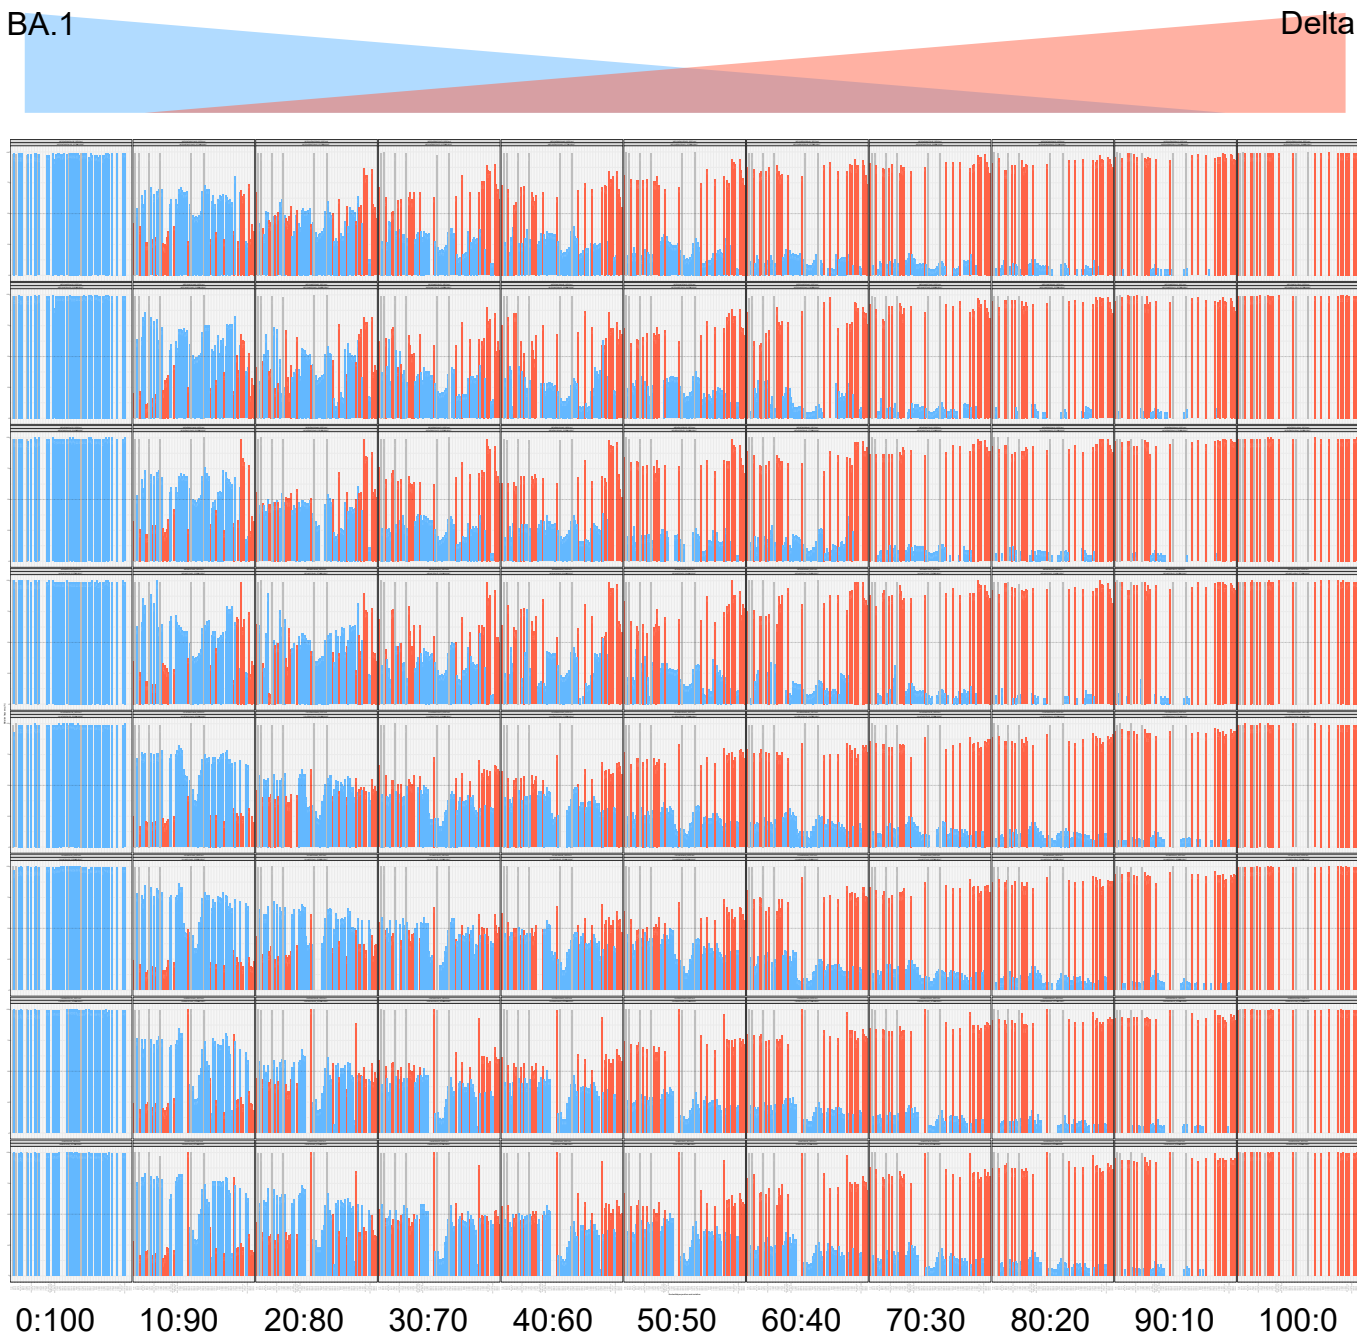

Figure S2

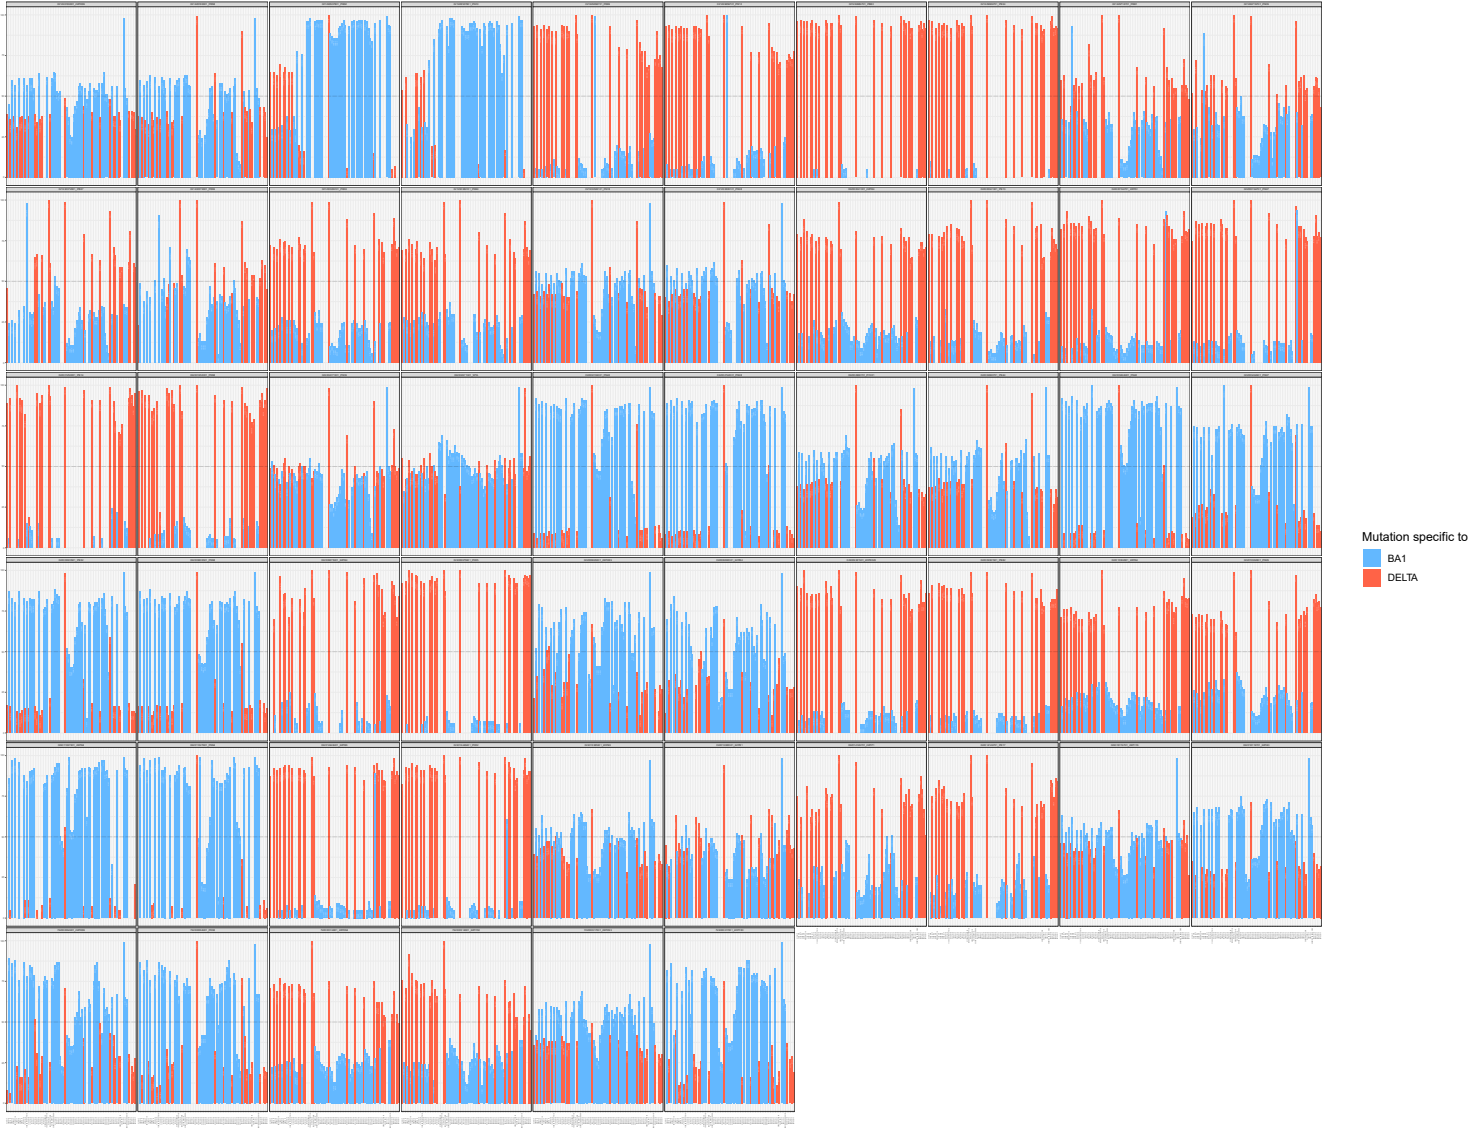

# Figure S3

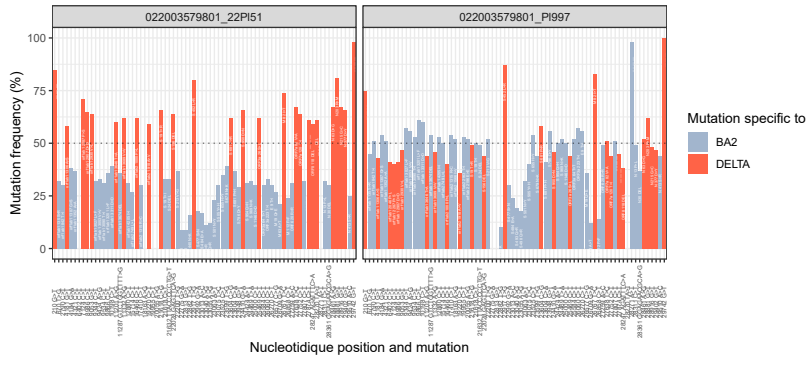

Figure S4

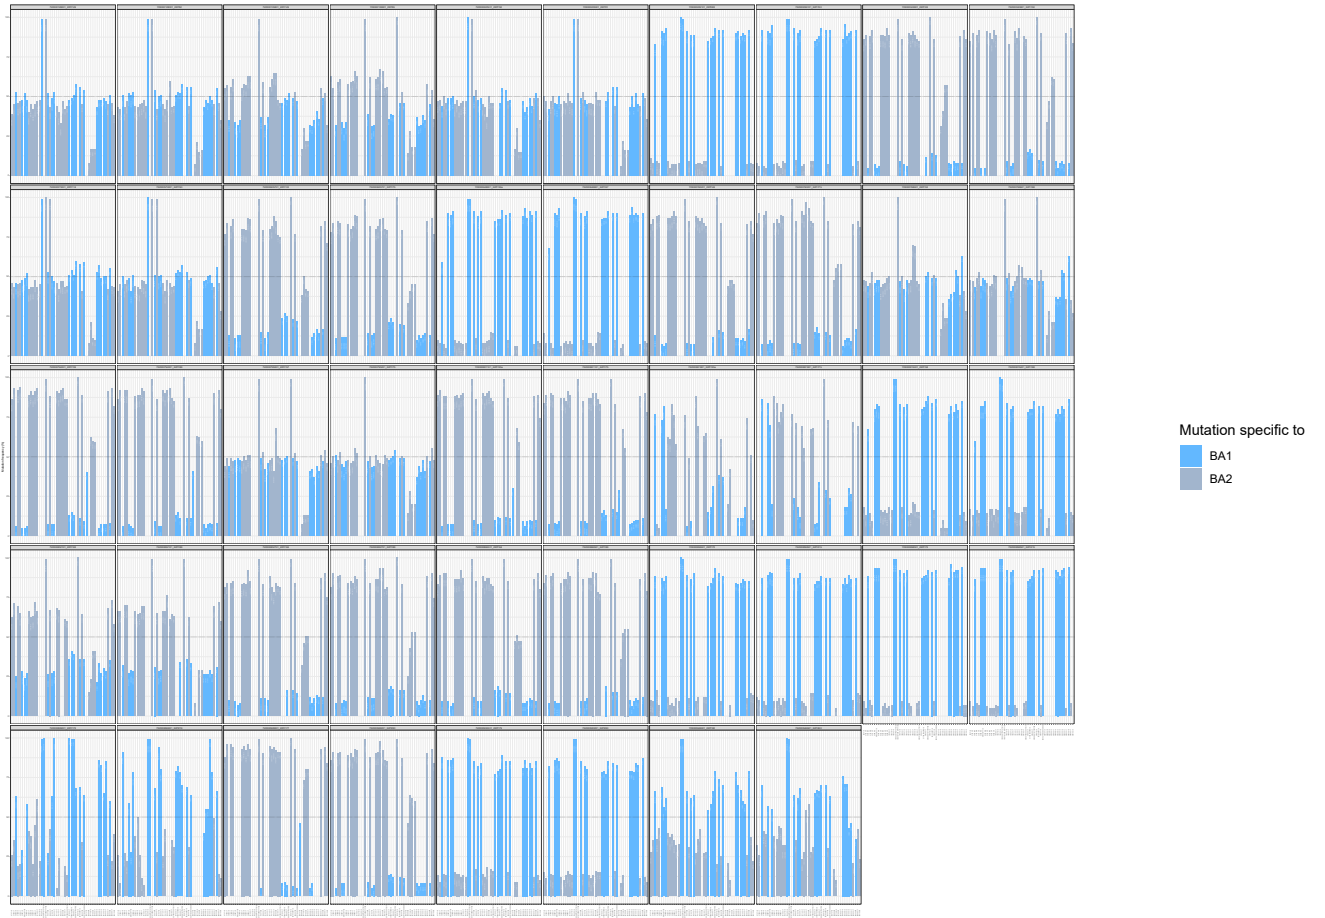

Supplement: Supplementary file [file media-3.pdf]
